# Supplementary material
Source: Springer Nature journal article supplement (https://www.springermedizin.de/resource/supplementary/12875_2001_6_MOESM2_ESM.rtf/9436096)
Supplement: MOESM2 [file 9436096]

Extract 2 – Bengali mothers in a Sylheti session discussing the perception of asthma 
M. Why do you think that is? [that some parents don't like admitting their child has asthma]
D. It's a social thing, people think that it's contagious and people stay away from asthmatics, it stigmatises you… in Bangladesh asthmatics have their own cutlery and crockery, I have heard that people don't arrange marriages with someone who is asthmatic, but that's in Bangladesh, I haven't seen that here… however, because there are Bangladeshis here it may be happening here as well
F. I have seen people avoiding the glasses and cups used by asthmatics in the family, even asthmatics will ask people to separate their crockery because they don't want to spread it
(General agreement)
M. So it's seen as contagious?
C.  It's seen as a big illness like TB, people are scared, they don't like to say in case they are treated differently
F. Some of that is here, after all we're Bengali and we have carried these beliefs with us here

See Additional file 1 for key to coding used in extract	
